# Supplementary material
Source: MDPI journal article supplement (https://www.mdpi.com/2673-5636/2/4/49)
Supplement: s1 [file s1]

Archive with 3 entries (3 files):
- Supplementary Material A.pdf
- Supplementary Material B.pdf
- Supplementary Material C.pdf
